# Supplementary material
Source: Springer Nature journal article supplement (https://www.springermedizin.de/resource/supplementary/13041_2010_91_MOESM10_ESM.pdf/25657500)

**A** Intact

**B** 4dpi

**C** 14dpi

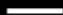

Supplement: MOESM10 [file 25657500]
